# Supplementary material for: Organo-clay hybrid hydrophobic spherical styrene divinylbenzene crosslink beads for high-performance carbon dioxide capture
Source: Royal Society of Chemistry journal article supplement (doi:10.1039/c7nj02141k), 2017-01-01
Supplement: c7nj02141k1.pdf [file c7nj02141k1.pdf]

Supporting information for

**Organo-clay hybrid hydrophobic spherical styrene divinyl benzene crosslink  
beads for high performance carbon dioxide capture**

Smita S. Nande<sup>a,b</sup>, Baijayantimala Garnaik<sup>a,b\*</sup>

<sup>a</sup>Polymer Science and Engineering Division, CSIR-National Chemical Laboratory, Pune-411008, India.

<sup>b</sup> Academy of Scientific and Innovative Research, New Delhi, India.

Present addresses

Corresponding Author: Dr. Baijayantimala Garnaik; E-mail: [b.garnaik@ncl.res.in](mailto:b.garnaik@ncl.res.in) Tel.: +91-20-25902304; Fax:+91-20-25902615

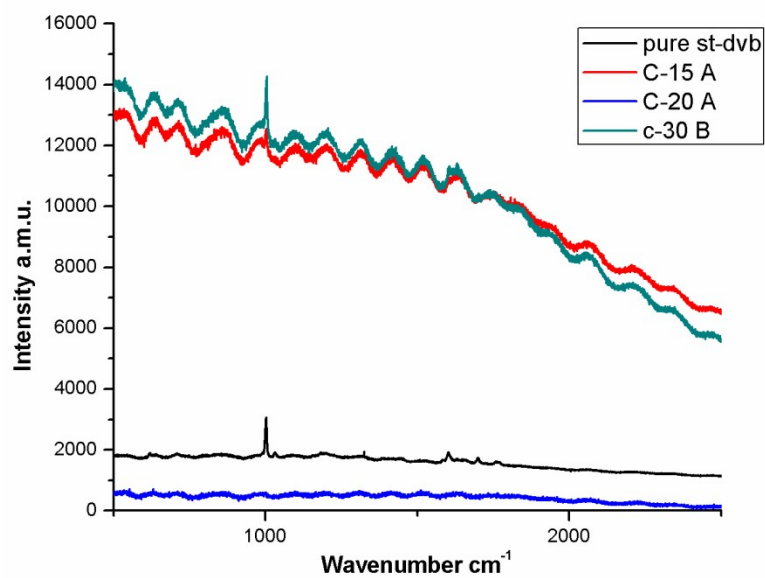

**Figure S1.** Raman spectra of styrene-divinyl benzene copolymers and various incorporated cloisites-SDBC.

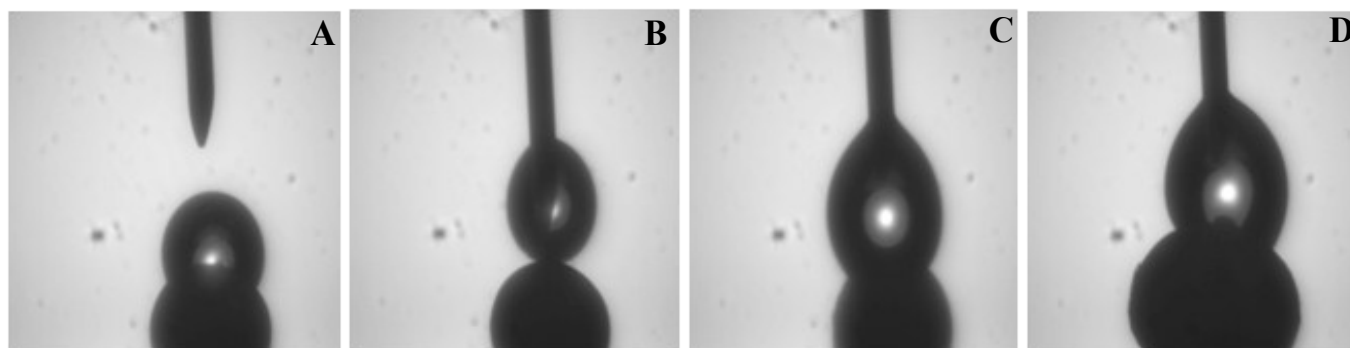

**Figure S2.** Contact angle measurement of (A) Pure SDBC, (B) Cloisite 15A-SDBC, (C) Cloisite 20A-SDBC, (D) Cloisite 30 B-SDBC.

**Table S1.** E-dax analysis data for Cloisite 15 A- SDBC, Cloisite 20B- SDBC and Cloisite 30B-SDBC showing Nitrogen, Carbon, Oxygen (At. Wt %) for each sample.

| Sample Name          | Carbon<br>At. Wt% | Nitrogen<br>At. Wt % | Oxygen<br>At. Wt % |
|----------------------|-------------------|----------------------|--------------------|
| Cloisite 15 A-SDBC-a | 82.50             | 10.91                | 6.59               |
| Cloisite 15 A-SDBC-b | 77.89             | 17.74                | 3.63               |
| Cloisite 15 A-SDBC-c | 59.50             | 33.19                | 7.32               |
| Cloisite 15 A-SDBC-d | 55.84             | 39.11                | 5.05               |
| Cloisite 20A-SDBC-a  | 47.85             | 36.74                | 5.38               |
| Cloisite 20A-SDBC-b  | 47.54             | 38.10                | 10.86              |
| Cloisite 20A-SDBC-c  | 50.50             | 36.22                | 3.26               |
| Cloisite 20A-SDBC-d  | 49.99             | 39.20                | 10.81              |
| Cloisite 30B-SDBC-a  | 90.49             | 5.00                 | 4.51               |
| Cloisite 30B-SDBC-b  | 83.40             | 5.82                 | 7.68               |
| Cloisite 30B-SDBC-c  | 73.30             | 6.78                 | 19.92              |
| Cloisite 30B-SDBC-d  | 58.84             | 25.40                | 14.41              |

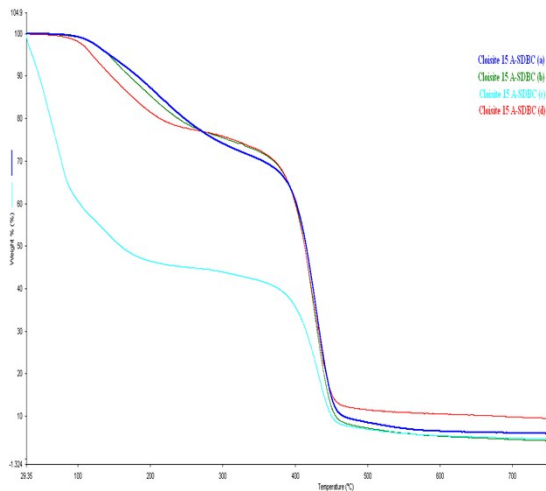

**Fig S3(A)**

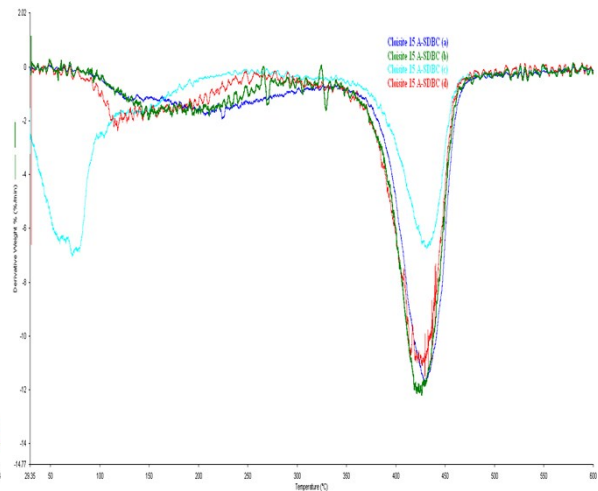

**Fig S3 (B)**

**Figure S3. (A)**Thermogravimetric analysis (TGA) and **(B)**Derivative thermo gravimetric analysis for (a) Cloisite 15A-SDBC-0.16 g (b) Cloisite 15A-SDBC-0.32 g (c) Cloisite 15A-SDBC-0.64 g (d) Cloisite 15A-SDBC-1.28gm g.

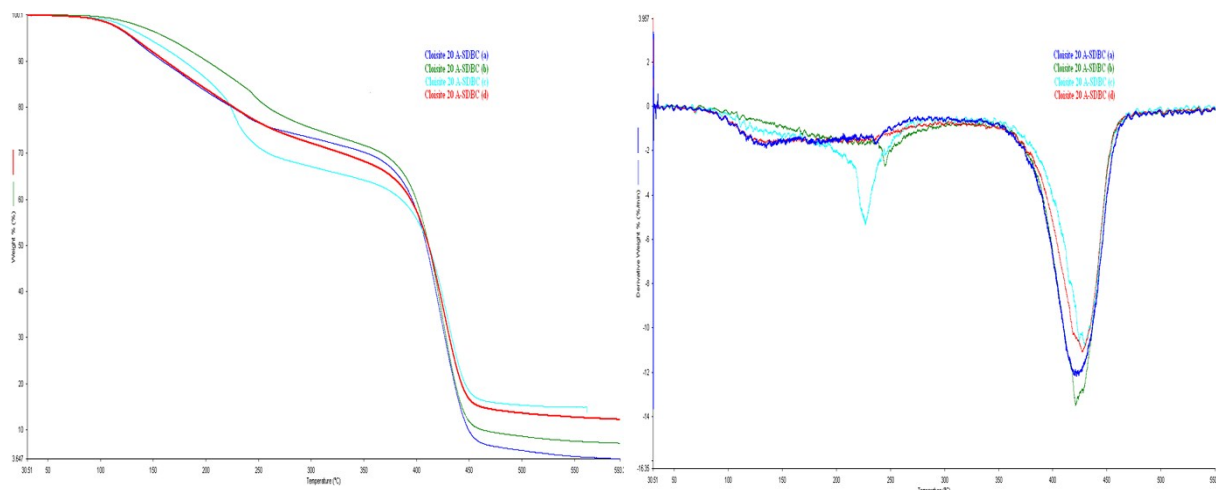

**Fig S4(A)**

**Fig S4 (B)**

**Figure S4. (A)** Thermogravimetric analysis (TGA) **(B)** Derivative thermo gravimetric analysis for 7(B) Cloisite 20A-SDBC (a) Cloisite 20A-SDBC-0.16 g (b) Cloisite 20A-SDBC-0.32 g (c) Cloisite 20A-SDBC-0.64 g (d) Cloisite 20A-SDBC-1.28 g

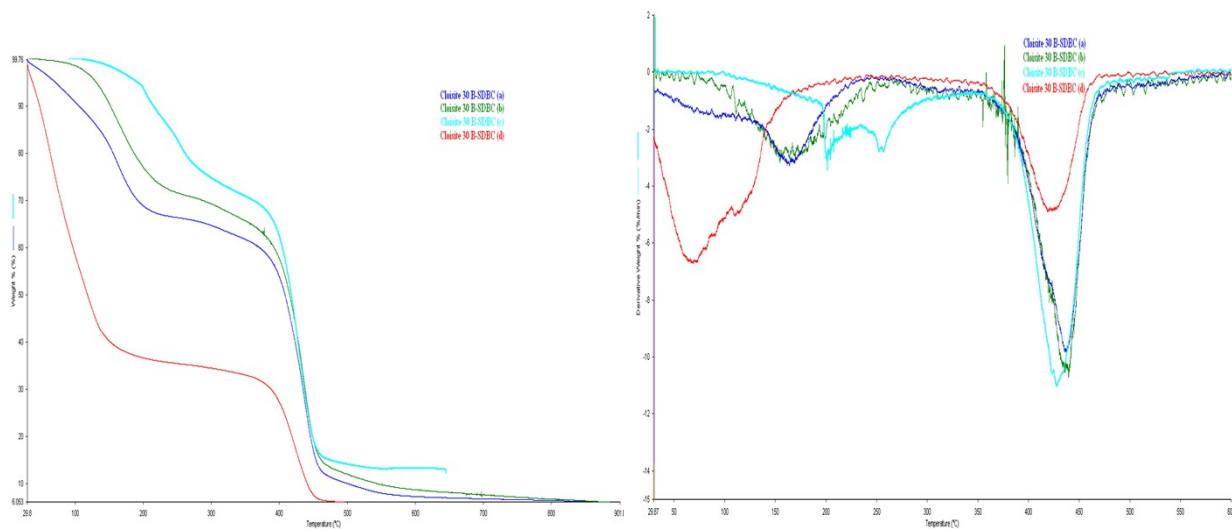

**Fig S5(A)**

**Fig S5 (B)**

**Figure S5. (A)** Thermogravimetric analysis (TGA) **(B)** Derivative thermo gravimetric analysis for 7(C) Cloisite 30B-SDBC (a) Cloisite 30B-SDBC-0.16 g (b) Cloisite 30B-SDBC-0.32 g (c) Cloisite 30B-SDBC-0.64 g (d) Cloisite 30B-SDBC-1.28 g .
